# Supplementary material for: Plant-derived benzoxazinoids act as antibiotics and shape bacterial communities
Source: bioRxiv or medRxiv preprint supplement (doi:10.1101/2021.01.12.425818), 2021-04-30
Supplement: Supplementary file [file media-1.pdf]

# Supplemental Tables for Plant-derived benzoxazinoids act as antibiotics and shape bacterial communities

Niklas Schandry, Katharina Jandrasits, Ruben Garrido-Oter, Claude Becker

## Contents

|                                                                    |           |
|--------------------------------------------------------------------|-----------|
| <b>Table S1. Syncom strains</b>                                    | <b>2</b>  |
| <b>Table S2. PERMANOVA</b>                                         | <b>5</b>  |
| <b>Table S3. ANOVA: observed taxa</b>                              | <b>6</b>  |
| <b>Table S4. Observed diversity means and pairwise comparisons</b> | <b>7</b>  |
| <b>Table S5. ANOVA: Shannon Diversity</b>                          | <b>9</b>  |
| <b>Table S6. Shannon diversity means and pairwise comparisons</b>  | <b>10</b> |

**Table S1. Syncom strains**

| Strain     | Genus              | Family             | Order               | Class               | Phylum         |
|------------|--------------------|--------------------|---------------------|---------------------|----------------|
| Mixed      |                    |                    |                     |                     |                |
| Root70     | Acidovorax         | Comamonadaceae     | Burkholderiales     | Betaproteobacteria  | Proteobacteria |
| Root236    | Aeromicrobium      | Nocardiodaceae     | Propionibacteriales | Actinomycetia       | Actinobacteria |
| Root100    | Aminobacter        | Phyllobacteriaceae | Rhizobiales         | Alphaproteobacteria | Proteobacteria |
| Root239    | Bacillus           | Bacillaceae        | Bacillales          | Bacilli             | Firmicutes     |
| Root483D1  | Bosea              | Bradyrhizobiaceae  | Rhizobiales         | Alphaproteobacteria | Proteobacteria |
| Root342    | Caulobacter        | Caulobacteraceae   | Caulobacterales     | Alphaproteobacteria | Proteobacteria |
| Root137    | Cellulomonas       | Cellulomonadaceae  | Actinomycetales     | Actinomycetia       | Actinobacteria |
| Root1480D1 | Duganella          | Oxalobacteraceae   | Burkholderiales     | Gammaproteobacteria | Proteobacteria |
| Root231    | Ensifer            | Rhizobiaceae       | Rhizobiales         | Alphaproteobacteria | Proteobacteria |
| Root420    | Flavobacterium     | Flavobacteriaceae  | Flavobacteriales    | Bacteroidia         | Bacteroidetes  |
| Root268    | Hoeflea            | Phyllobacteriaceae | Rhizobiales         | Alphaproteobacteria | Proteobacteria |
| Root209    | Hydrogenophaga     | Comamonadaceae     | Burkholderiales     | Gammaproteobacteria | Proteobacteria |
| Root107    | Kitasatospora      | Streptomycetaceae  | Streptomycetales    | Actinomycetia       | Actinobacteria |
| Root96     | Lysobacter         | Xanthomonadaceae   | Xanthomonadales     | Gammaproteobacteria | Proteobacteria |
| Root133    | Massilia           | Oxalobacteraceae   | Burkholderiales     | Gammaproteobacteria | Proteobacteria |
| Root172    | Mesorhizobium      | Phyllobacteriaceae | Rhizobiales         | Alphaproteobacteria | Proteobacteria |
| Root180    | Microbacterium     | Microbacteriaceae  | Actinomycetales     | Actinomycetia       | Actinobacteria |
| Root1257   | Nocardioides       | Nocardiodaceae     | Propionibacteriales | Actinomycetia       | Actinobacteria |
| Root444D2  | Paenibacillus      | Paenibacillaceae   | Paenibacillales     | Bacilli             | Firmicutes     |
| Root101    | Phycoccus          | Intrasporangiaceae | Actinomycetales     | Actinomycetia       | Actinobacteria |
| Root1204   | Rhizobium          | Rhizobiaceae       | Rhizobiales         | Alphaproteobacteria | Proteobacteria |
| Root214    | Sphingopyxis       | Sphingomonadaceae  | Sphingomonadales    | Alphaproteobacteria | Proteobacteria |
| Tolerant   |                    |                    |                     |                     |                |
| Root217    | Acidovorax         | Comamonadaceae     | Burkholderiales     | Betaproteobacteria  | Proteobacteria |
| Root1280   | Acinetobacter      | Moraxellaceae      | Pseudomonadales     | Gammaproteobacteria | Proteobacteria |
| Root495    | Aeromicrobium      | Nocardiodaceae     | Propionibacteriales | Actinomycetia       | Actinobacteria |
| Root123D2  | Afipia             | Bradyrhizobiaceae  | Rhizobiales         | Alphaproteobacteria | Proteobacteria |
| Soil762    | Arthrobacter       | Micrococcaceae     | Actinomycetales     | Actinomycetia       | Actinobacteria |
| Root239    | Bacillus           | Bacillaceae        | Bacillales          | Bacilli             | Firmicutes     |
| Root565    | Bordetella         | Alcaligenaceae     | Burkholderiales     | Gammaproteobacteria | Proteobacteria |
| Root381    | Bosea              | Bradyrhizobiaceae  | Rhizobiales         | Alphaproteobacteria | Proteobacteria |
| Root1472   | Caulobacter        | Caulobacteraceae   | Caulobacterales     | Alphaproteobacteria | Proteobacteria |
| Root919    | Cupriavidus        | Burkholderiaceae   | Burkholderiales     | Gammaproteobacteria | Proteobacteria |
| Root685    | Devosia            | Hyphomicrobiaceae  | Rhizobiales         | Alphaproteobacteria | Proteobacteria |
| Root1312   | Ensifer            | Rhizobiaceae       | Rhizobiales         | Alphaproteobacteria | Proteobacteria |
| Root1212   | Hoeflea            | Phyllobacteriaceae | Rhizobiales         | Alphaproteobacteria | Proteobacteria |
| Soil729    | Knoellia           | Intrasporangiaceae | Actinomycetales     | Actinomycetia       | Actinobacteria |
| Root112D2  | Leifsonia          | Microbacteriaceae  | Actinomycetales     | Actinomycetia       | Actinobacteria |
| Root133    | Massilia           | Oxalobacteraceae   | Burkholderiales     | Gammaproteobacteria | Proteobacteria |
| Root102    | Mesorhizobium      | Phyllobacteriaceae | Rhizobiales         | Alphaproteobacteria | Proteobacteria |
| Root1272   | Methylibium        | Burkholderiales    | Burkholderiales     | Gammaproteobacteria | Proteobacteria |
| Root166    | Microbacterium     | Microbacteriaceae  | Actinomycetales     | Actinomycetia       | Actinobacteria |
| Root135    | Mycobacterium      | Mycobacteriaceae   | Mycobacteriales     | Actinomycetia       | Actinobacteria |
| Root157    | Nitratireductor    | Phyllobacteriaceae | Rhizobiales         | Alphaproteobacteria | Proteobacteria |
| Root79     | Nocardioides       | Nocardiodaceae     | Propionibacteriales | Actinomycetia       | Actinobacteria |
| Root189    | Noviherbaspirillum | Oxalobacteraceae   | Burkholderiales     | Gammaproteobacteria | Proteobacteria |
| Root918    | Oerskovia          | Cellulomonadaceae  | Actinomycetales     | Actinomycetia       | Actinobacteria |
| Root700    | Phenylobacterium   | Caulobacteraceae   | Caulobacterales     | Alphaproteobacteria | Proteobacteria |

|            |                  |                    |                     |                     |                |
|------------|------------------|--------------------|---------------------|---------------------|----------------|
| Root9      | Pseudomonas      | Pseudomonadaceae   | Pseudomonadales     | Gammaproteobacteria | Proteobacteria |
| Root1203   | Rhizobium        | Rhizobiaceae       | Rhizobiales         | Alphaproteobacteria | Proteobacteria |
| Root561    | Rhodanobacter    | Xanthomonadaceae   | Xanthomonadales     | Gammaproteobacteria | Proteobacteria |
| Root66D1   | Streptomyces     | Streptomycetaceae  | Streptomycetales    | Actinomycetia       | Actinobacteria |
| Root85     | Terrabacter      | Intrasporangiaceae | Actinomycetales     | Actinomycetia       | Actinobacteria |
| Soil756    | Tetrasphaera     | Intrasporangiaceae | Actinomycetales     | Actinomycetia       | Actinobacteria |
| Sensitive  |                  |                    |                     |                     |                |
| Root70     | Acidovorax       | Comamonadaceae     | Burkholderiales     | Betaproteobacteria  | Proteobacteria |
| Root236    | Aeromicrobium    | Nocardioidaceae    | Propionibacteriales | Actinomycetia       | Actinobacteria |
| Root100    | Aminobacter      | Phyllobacteriaceae | Rhizobiales         | Alphaproteobacteria | Proteobacteria |
| Soil531    | Bacillus         | Bacillaceae        | Bacillales          | Bacilli             | Firmicutes     |
| Root483D1  | Bosea            | Bradyrhizobiaceae  | Rhizobiales         | Alphaproteobacteria | Proteobacteria |
| Root137    | Cellulomonas     | Cellulomonadaceae  | Actinomycetales     | Actinomycetia       | Actinobacteria |
| Root142    | Ensifer          | Rhizobiaceae       | Rhizobiales         | Alphaproteobacteria | Proteobacteria |
| Root935    | Flavobacterium   | Flavobacteriaceae  | Flavobacteriales    | Bacteroidia         | Bacteroidetes  |
| Root209    | Hydrogenophaga   | Comamonadaceae     | Burkholderiales     | Gammaproteobacteria | Proteobacteria |
| Root983    | Lysobacter       | Xanthomonadaceae   | Xanthomonadales     | Gammaproteobacteria | Proteobacteria |
| Root172    | Mesorhizobium    | Phyllobacteriaceae | Rhizobiales         | Alphaproteobacteria | Proteobacteria |
| Root61     | Microbacterium   | Microbacteriaceae  | Actinomycetales     | Actinomycetia       | Actinobacteria |
| Root240    | Nocardioides     | Nocardioidaceae    | Propionibacteriales | Actinomycetia       | Actinobacteria |
| Soil750    | Paenibacillus    | Paenibacillaceae   | Paenibacillales     | Bacilli             | Firmicutes     |
| Root1277   | Phenylobacterium | Caulobacteraceae   | Caulobacterales     | Alphaproteobacteria | Proteobacteria |
| Root563    | Phycococcus      | Intrasporangiaceae | Actinomycetales     | Actinomycetia       | Actinobacteria |
| Root274    | Rhizobium        | Rhizobiaceae       | Rhizobiales         | Alphaproteobacteria | Proteobacteria |
| Root214    | Sphingopyxis     | Sphingomonadaceae  | Sphingomonadales    | Alphaproteobacteria | Proteobacteria |
| Soil811    | Terrabacter      | Intrasporangiaceae | Actinomycetales     | Actinomycetia       | Actinobacteria |
| Root434    | Variovorax       | Comamonadaceae     | Burkholderiales     | Gammaproteobacteria | Proteobacteria |
| Random     |                  |                    |                     |                     |                |
| Root217    | Acidovorax       | Comamonadaceae     | Burkholderiales     | Betaproteobacteria  | Proteobacteria |
| Root1280   | Acinetobacter    | Moraxellaceae      | Pseudomonadales     | Gammaproteobacteria | Proteobacteria |
| Root344    | Aeromicrobium    | Nocardioidaceae    | Propionibacteriales | Actinomycetia       | Actinobacteria |
| Root123D2  | Afipia           | Bradyrhizobiaceae  | Rhizobiales         | Alphaproteobacteria | Proteobacteria |
| Root1464   | Agromyces        | Microbacteriaceae  | Actinomycetales     | Actinomycetia       | Actinobacteria |
| Soil736    | Arthrobacter     | Micrococcaceae     | Actinomycetales     | Actinomycetia       | Actinobacteria |
| Soil531    | Bacillus         | Bacillaceae        | Bacillales          | Bacilli             | Firmicutes     |
| Root565    | Bordetella       | Alcaligenaceae     | Burkholderiales     | Gammaproteobacteria | Proteobacteria |
| Root381    | Bosea            | Bradyrhizobiaceae  | Rhizobiales         | Alphaproteobacteria | Proteobacteria |
| Root342    | Caulobacter      | Caulobacteraceae   | Caulobacterales     | Alphaproteobacteria | Proteobacteria |
| Root137    | Cellulomonas     | Cellulomonadaceae  | Actinomycetales     | Actinomycetia       | Actinobacteria |
| Root919    | Cupriavidus      | Burkholderiaceae   | Burkholderiales     | Gammaproteobacteria | Proteobacteria |
| Root105    | Devosia          | Hyphomicrobiaceae  | Rhizobiales         | Alphaproteobacteria | Proteobacteria |
| Root1480D1 | Duganella        | Oxalobacteraceae   | Burkholderiales     | Gammaproteobacteria | Proteobacteria |
| Root1252   | Ensifer          | Rhizobiaceae       | Rhizobiales         | Alphaproteobacteria | Proteobacteria |
| Root420    | Flavobacterium   | Flavobacteriaceae  | Flavobacteriales    | Bacteroidia         | Bacteroidetes  |
| Root268    | Hoeflea          | Phyllobacteriaceae | Rhizobiales         | Alphaproteobacteria | Proteobacteria |
| Soil728    | Janibacter       | Intrasporangiaceae | Actinomycetales     | Actinomycetia       | Actinobacteria |
| Root107    | Kitasatospora    | Streptomycetaceae  | Streptomycetales    | Actinomycetia       | Actinobacteria |
| Soil729    | Knoellia         | Intrasporangiaceae | Actinomycetales     | Actinomycetia       | Actinobacteria |
| Root1293   | Leifsonia        | Microbacteriaceae  | Actinomycetales     | Actinomycetia       | Actinobacteria |
| Root604    | Lysobacter       | Xanthomonadaceae   | Xanthomonadales     | Gammaproteobacteria | Proteobacteria |
| Root133    | Massilia         | Oxalobacteraceae   | Burkholderiales     | Gammaproteobacteria | Proteobacteria |
| Root1471   | Mesorhizobium    | Phyllobacteriaceae | Rhizobiales         | Alphaproteobacteria | Proteobacteria |

|          |                    |                    |                     |                     |                |
|----------|--------------------|--------------------|---------------------|---------------------|----------------|
| Root1272 | Methylibium        | Burkholderiales    | Burkholderiales     | Gammaproteobacteria | Proteobacteria |
| Root322  | Microbacterium     | Microbacteriaceae  | Actinomycetales     | Actinomycetia       | Actinobacteria |
| Soil538  | Mycobacterium      | Mycobacteriaceae   | Mycobacteriales     | Actinomycetia       | Actinobacteria |
| Root157  | Nitratireductor    | Phyllobacteriaceae | Rhizobiales         | Alphaproteobacteria | Proteobacteria |
| Root136  | Nocardia           | Nocardiaceae       | Mycobacteriales     | Actinomycetia       | Actinobacteria |
| Root1257 | Nocardioides       | Nocardioidaceae    | Propionibacteriales | Actinomycetia       | Actinobacteria |
| Root189  | Noviherbaspirillum | Oxalobacteraceae   | Burkholderiales     | Gammaproteobacteria | Proteobacteria |
| Root22   | Oerskovia          | Cellulomonadaceae  | Actinomycetales     | Actinomycetia       | Actinobacteria |
| Root52   | Paenibacillus      | Paenibacillaceae   | Paenibacillales     | Bacilli             | Firmicutes     |
| Root700  | Phenylobacterium   | Caulobacteraceae   | Caulobacterales     | Alphaproteobacteria | Proteobacteria |
| Root563  | Phycococcus        | Intrasporangiaceae | Actinomycetales     | Actinomycetia       | Actinobacteria |
| Root329  | Pseudomonas        | Pseudomonadaceae   | Pseudomonadales     | Gammaproteobacteria | Proteobacteria |
| Root65   | Pseudoxanthomonas  | Xanthomonadaceae   | Xanthomonadales     | Gammaproteobacteria | Proteobacteria |
| Root29   | Rhizobacter        | Pseudomonadaceae   | Burkholderiales     | Gammaproteobacteria | Proteobacteria |
| Root708  | Rhizobium          | Rhizobiaceae       | Rhizobiales         | Alphaproteobacteria | Proteobacteria |
| Soil772  | Rhodanobacter      | Xanthomonadaceae   | Xanthomonadales     | Gammaproteobacteria | Proteobacteria |
| Root1294 | Sphingomonas       | Sphingomonadaceae  | Sphingomonadales    | Alphaproteobacteria | Proteobacteria |
| Root214  | Sphingopyxis       | Sphingomonadaceae  | Sphingomonadales    | Alphaproteobacteria | Proteobacteria |
| Root1310 | Streptomyces       | Streptomycetaceae  | Streptomycetales    | Actinomycetia       | Actinobacteria |
| Soil811  | Terrabacter        | Intrasporangiaceae | Actinomycetales     | Actinomycetia       | Actinobacteria |
| Soil756  | Tetrasphaera       | Intrasporangiaceae | Actinomycetales     | Actinomycetia       | Actinobacteria |
| Root411  | Variovorax         | Comamonadaceae     | Burkholderiales     | Gammaproteobacteria | Proteobacteria |
| Root332  | Yonghaparkia       | Microbacteriaceae  | Actinomycetales     | Actinomycetia       | Actinobacteria |

**Table S2. PERMANOVA**

| term                | Df | SumsOfSqs | MeanSqs | F.Model | R2     | p.value   |
|---------------------|----|-----------|---------|---------|--------|-----------|
| Random              |    |           |         |         |        |           |
| Timepoint           | 3  | 1.1953    | 0.3984  | 14.7627 | 0.3100 | 0.001 * * |
| Treatment           | 2  | 1.5522    | 0.7761  | 28.7561 | 0.4026 | 0.001 * * |
| Timepoint:Treatment | 6  | 0.1363    | 0.0227  | 0.8420  | 0.0354 | 0.594     |
| Residuals           | 36 | 0.9716    | 0.0270  | NA      | 0.2520 | NA        |
| Total               | 47 | 3.8555    | NA      | NA      | 1.0000 | NA        |
| Tolerant            |    |           |         |         |        |           |
| Timepoint           | 3  | 0.9527    | 0.3176  | 10.9268 | 0.3293 | 0.001 * * |
| Treatment           | 2  | 0.6252    | 0.3126  | 10.7561 | 0.2161 | 0.001 * * |
| Timepoint:Treatment | 6  | 0.2687    | 0.0448  | 1.5410  | 0.0929 | 0.098     |
| Residuals           | 36 | 1.0463    | 0.0291  | NA      | 0.3617 | NA        |
| Total               | 47 | 2.8929    | NA      | NA      | 1.0000 | NA        |
| Mixed               |    |           |         |         |        |           |
| Timepoint           | 3  | 0.1909    | 0.0636  | 1.2030  | 0.0199 | 0.296     |
| Treatment           | 2  | 7.2278    | 3.6139  | 68.3271 | 0.7544 | 0.001 * * |
| Timepoint:Treatment | 6  | 0.2575    | 0.0429  | 0.8115  | 0.0269 | 0.621     |
| Residuals           | 36 | 1.9041    | 0.0529  | NA      | 0.1987 | NA        |
| Total               | 47 | 9.5803    | NA      | NA      | 1.0000 | NA        |
| Sensitive           |    |           |         |         |        |           |
| Timepoint           | 3  | 0.0395    | 0.0132  | 1.9094  | 0.0631 | 0.130     |
| Treatment           | 2  | 0.2605    | 0.1303  | 18.9085 | 0.4166 | 0.001 * * |
| Timepoint:Treatment | 6  | 0.0774    | 0.0129  | 1.8728  | 0.1238 | 0.081     |
| Residuals           | 36 | 0.2480    | 0.0069  | NA      | 0.3966 | NA        |
| Total               | 47 | 0.6254    | NA      | NA      | 1.0000 | NA        |

**Table S3. ANOVA: observed taxa**

| term                | df | sumsq      | meansq      | statistic  | p.value          |
|---------------------|----|------------|-------------|------------|------------------|
| Random              |    |            |             |            |                  |
| Treatment           | 2  | 0.05101594 | 0.025507971 | 4.1016798  | 2.484563e-02 *   |
| Timepoint           | 3  | 0.25046221 | 0.083487403 | 13.4247681 | 4.907087e-06 * * |
| Treatment:Timepoint | 6  | 0.01463861 | 0.002439768 | 0.3923145  | 8.790628e-01     |
| Residuals           | 36 | 0.22388070 | 0.006218908 | NA         | NA               |
| Tolerant            |    |            |             |            |                  |
| Treatment           | 2  | 0.21585880 | 0.107929398 | 13.1512316 | 5.156453e-05 * * |
| Timepoint           | 3  | 0.32902545 | 0.109675150 | 13.3639521 | 5.118265e-06 * * |
| Treatment:Timepoint | 6  | 0.03393162 | 0.005655270 | 0.6890965  | 6.596909e-01     |
| Residuals           | 36 | 0.29544444 | 0.008206790 | NA         | NA               |
| Mixed               |    |            |             |            |                  |
| Treatment           | 2  | 2.32954036 | 1.164770180 | 41.3453120 | 4.720082e-10 * * |
| Timepoint           | 3  | 0.35051038 | 0.116836792 | 4.1473019  | 1.268430e-02 *   |
| Treatment:Timepoint | 6  | 0.31516138 | 0.052526897 | 1.8645231  | 1.140745e-01     |
| Residuals           | 36 | 1.01418334 | 0.028171759 | NA         | NA               |
| Sensitive           |    |            |             |            |                  |
| Treatment           | 2  | 0.46631836 | 0.233159182 | 30.3635644 | 1.877482e-08 * * |
| Timepoint           | 3  | 0.07701343 | 0.025671142 | 3.3430696  | 2.974336e-02 *   |
| Treatment:Timepoint | 6  | 0.09728286 | 0.016213809 | 2.1114718  | 7.590701e-02     |
| Residuals           | 36 | 0.27644088 | 0.007678913 | NA         | NA               |

Table S4. Observed diversity means and pairwise comparisons

| Treatment      | estimate | 95% CI          | Group <sup>1</sup> |
|----------------|----------|-----------------|--------------------|
| Random - 24h   |          |                 |                    |
| BOA            | 1.148    | [1.068 - 1.228] | a                  |
| APO            | 1.216    | [1.136 - 1.296] | a                  |
| Control        | 1.224    | [1.144 - 1.304] | a                  |
| Random - 48h   |          |                 |                    |
| BOA            | 1.221    | [1.141 - 1.301] | a                  |
| APO            | 1.282    | [1.202 - 1.362] | a                  |
| Control        | 1.297    | [1.217 - 1.377] | a                  |
| Random - 72h   |          |                 |                    |
| APO            | 1.329    | [1.249 - 1.409] | a                  |
| BOA            | 1.349    | [1.269 - 1.429] | a                  |
| Control        | 1.435    | [1.355 - 1.515] | a                  |
| Random - 96h   |          |                 |                    |
| BOA            | 1.328    | [1.248 - 1.408] | a                  |
| APO            | 1.351    | [1.271 - 1.431] | a                  |
| Control        | 1.407    | [1.327 - 1.487] | a                  |
| Tolerant - 24h |          |                 |                    |
| BOA            | 0.964    | [0.872 - 1.056] | a                  |
| Control        | 0.994    | [0.902 - 1.086] | ab                 |
| APO            | 1.125    | [1.033 - 1.217] | b                  |
| Tolerant - 48h |          |                 |                    |
| Control        | 1.055    | [0.963 - 1.147] | a                  |
| BOA            | 1.145    | [1.053 - 1.237] | ab                 |
| APO            | 1.275    | [1.183 - 1.367] | b                  |
| Tolerant - 72h |          |                 |                    |
| Control        | 1.128    | [1.036 - 1.22]  | a                  |
| BOA            | 1.165    | [1.073 - 1.257] | ab                 |
| APO            | 1.315    | [1.223 - 1.407] | b                  |
| Tolerant - 96h |          |                 |                    |
| Control        | 1.208    | [1.117 - 1.3]   | a                  |
| BOA            | 1.247    | [1.155 - 1.339] | a                  |
| APO            | 1.295    | [1.203 - 1.387] | a                  |
| Mixed - 24h    |          |                 |                    |
| BOA            | 0.539    | [0.368 - 0.709] | a                  |
| Control        | 0.666    | [0.496 - 0.836] | ab                 |
| APO            | 0.907    | [0.737 - 1.078] | b                  |
| Mixed - 48h    |          |                 |                    |
| BOA            | 0.228    | [0.057 - 0.398] | a                  |
| Control        | 0.344    | [0.174 - 0.514] | a                  |
| APO            | 1.027    | [0.856 - 1.197] | b                  |
| Mixed - 72h    |          |                 |                    |

|                 |       |                  |    |
|-----------------|-------|------------------|----|
| BOA             | 0.250 | [0.08 - 0.42]    | a  |
| Control         | 0.423 | [0.253 - 0.593]  | a  |
| APO             | 0.739 | [0.569 - 0.909]  | b  |
| Mixed - 96h     |       |                  |    |
| BOA             | 0.385 | [0.215 - 0.555]  | a  |
| Control         | 0.532 | [0.361 - 0.702]  | ab |
| APO             | 0.814 | [0.644 - 0.984]  | b  |
| Sensitive - 24h |       |                  |    |
| APO             | 0.041 | [-0.048 - 0.13]  | a  |
| Control         | 0.210 | [0.121 - 0.299]  | b  |
| BOA             | 0.220 | [0.131 - 0.309]  | b  |
| Sensitive - 48h |       |                  |    |
| APO             | 0.044 | [-0.045 - 0.133] | a  |
| Control         | 0.144 | [0.055 - 0.233]  | a  |
| BOA             | 0.377 | [0.289 - 0.466]  | b  |
| Sensitive - 72h |       |                  |    |
| APO             | 0.024 | [-0.065 - 0.113] | a  |
| Control         | 0.057 | [-0.032 - 0.146] | a  |
| BOA             | 0.308 | [0.22 - 0.397]   | b  |
| Sensitive - 96h |       |                  |    |
| APO             | 0.021 | [-0.068 - 0.109] | a  |
| Control         | 0.043 | [-0.045 - 0.132] | ab |
| BOA             | 0.174 | [0.085 - 0.262]  | b  |

<sup>1</sup>Different letters indicate significant differences within one Syncom / Timepoint combination (alpha = 0.05), Tukey adjusted

**Table S5. ANOVA: Shannon Diversity**

| term                | df | sumsq      | meansq      | statistic  | p.value          |
|---------------------|----|------------|-------------|------------|------------------|
| Random              |    |            |             |            |                  |
| Treatment           | 2  | 0.04965670 | 0.024828351 | 3.9818448  | 2.740000e-02 *   |
| Timepoint           | 3  | 0.25834405 | 0.086114684 | 13.8106353 | 3.764333e-06 * * |
| Treatment:Timepoint | 6  | 0.02053069 | 0.003421782 | 0.5487681  | 7.675710e-01     |
| Residuals           | 36 | 0.22447400 | 0.006235389 | NA         | NA               |
| Tolerant            |    |            |             |            |                  |
| Treatment           | 2  | 0.20619734 | 0.103098670 | 11.8582100 | 1.106005e-04 * * |
| Timepoint           | 3  | 0.31193275 | 0.103977584 | 11.9593009 | 1.392757e-05 * * |
| Treatment:Timepoint | 6  | 0.03231331 | 0.005385552 | 0.6194357  | 7.133662e-01     |
| Residuals           | 36 | 0.31299430 | 0.008694286 | NA         | NA               |
| Mixed               |    |            |             |            |                  |
| Treatment           | 2  | 2.20186153 | 1.100930766 | 37.4317591 | 1.611570e-09 * * |
| Timepoint           | 3  | 0.31214721 | 0.104049071 | 3.5376791  | 2.413246e-02 *   |
| Treatment:Timepoint | 6  | 0.31328626 | 0.052214376 | 1.7752942  | 1.320402e-01     |
| Residuals           | 36 | 1.05882033 | 0.029411676 | NA         | NA               |
| Sensitive           |    |            |             |            |                  |
| Treatment           | 2  | 0.64164868 | 0.320824339 | 33.1316491 | 6.894276e-09 * * |
| Timepoint           | 3  | 0.09113328 | 0.030377760 | 3.1371226  | 3.717840e-02 *   |
| Treatment:Timepoint | 6  | 0.12710073 | 0.021183455 | 2.1876233  | 6.692054e-02     |
| Residuals           | 36 | 0.34859950 | 0.009683319 | NA         | NA               |

**Table S6. Shannon diversity means and pairwise comparisons**

| Treatment      | estimate | 95% CI          | Group <sup>1</sup> |
|----------------|----------|-----------------|--------------------|
| Random - 24h   |          |                 |                    |
| BOA            | 1.130    | [1.05 - 1.21]   | a                  |
| Control        | 1.224    | [1.144 - 1.305] | a                  |
| APO            | 1.225    | [1.145 - 1.305] | a                  |
| Random - 48h   |          |                 |                    |
| BOA            | 1.235    | [1.155 - 1.315] | a                  |
| APO            | 1.282    | [1.202 - 1.362] | a                  |
| Control        | 1.296    | [1.216 - 1.376] | a                  |
| Random - 72h   |          |                 |                    |
| APO            | 1.329    | [1.249 - 1.409] | a                  |
| BOA            | 1.354    | [1.274 - 1.435] | a                  |
| Control        | 1.437    | [1.357 - 1.517] | a                  |
| Random - 96h   |          |                 |                    |
| BOA            | 1.330    | [1.25 - 1.41]   | a                  |
| APO            | 1.349    | [1.269 - 1.429] | a                  |
| Control        | 1.406    | [1.326 - 1.486] | a                  |
| Tolerant - 24h |          |                 |                    |
| BOA            | 0.995    | [0.9 - 1.09]    | a                  |
| Control        | 1.023    | [0.928 - 1.117] | a                  |
| APO            | 1.142    | [1.047 - 1.236] | a                  |
| Tolerant - 48h |          |                 |                    |
| Control        | 1.071    | [0.976 - 1.166] | a                  |
| BOA            | 1.162    | [1.067 - 1.256] | ab                 |
| APO            | 1.290    | [1.195 - 1.384] | b                  |
| Tolerant - 72h |          |                 |                    |
| Control        | 1.148    | [1.053 - 1.242] | a                  |
| BOA            | 1.182    | [1.087 - 1.276] | ab                 |
| APO            | 1.333    | [1.239 - 1.428] | b                  |
| Tolerant - 96h |          |                 |                    |
| Control        | 1.231    | [1.137 - 1.326] | a                  |
| BOA            | 1.263    | [1.169 - 1.358] | a                  |
| APO            | 1.317    | [1.223 - 1.412] | a                  |
| Mixed - 24h    |          |                 |                    |
| BOA            | 0.517    | [0.343 - 0.691] | a                  |
| Control        | 0.651    | [0.477 - 0.825] | ab                 |
| APO            | 0.917    | [0.743 - 1.091] | b                  |
| Mixed - 48h    |          |                 |                    |
| BOA            | 0.233    | [0.059 - 0.407] | a                  |
| Control        | 0.353    | [0.179 - 0.527] | a                  |
| APO            | 1.021    | [0.847 - 1.195] | b                  |
| Mixed - 72h    |          |                 |                    |

|                 |       |                  |    |
|-----------------|-------|------------------|----|
| BOA             | 0.258 | [0.084 - 0.432]  | a  |
| Control         | 0.443 | [0.269 - 0.617]  | ab |
| APO             | 0.723 | [0.549 - 0.897]  | b  |
| Mixed - 96h     |       |                  |    |
| BOA             | 0.402 | [0.228 - 0.576]  | a  |
| Control         | 0.555 | [0.381 - 0.729]  | ab |
| APO             | 0.789 | [0.615 - 0.962]  | b  |
| Sensitive - 24h |       |                  |    |
| APO             | 0.043 | [-0.057 - 0.143] | a  |
| Control         | 0.234 | [0.134 - 0.334]  | b  |
| BOA             | 0.247 | [0.147 - 0.347]  | b  |
| Sensitive - 48h |       |                  |    |
| APO             | 0.051 | [-0.049 - 0.151] | a  |
| Control         | 0.172 | [0.072 - 0.272]  | a  |
| BOA             | 0.439 | [0.339 - 0.539]  | b  |
| Sensitive - 72h |       |                  |    |
| APO             | 0.032 | [-0.068 - 0.131] | a  |
| Control         | 0.073 | [-0.027 - 0.173] | a  |
| BOA             | 0.368 | [0.268 - 0.467]  | b  |
| Sensitive - 96h |       |                  |    |
| APO             | 0.027 | [-0.073 - 0.127] | a  |
| Control         | 0.056 | [-0.044 - 0.156] | ab |
| BOA             | 0.214 | [0.114 - 0.314]  | b  |

<sup>1</sup>Different letters indicate significant differences within one Syncom / Timepoint combination (alpha = 0.05), Tukey adjusted
